# Supplementary material for: Functionalized Fluorescent Silica Nanoparticles for Bioimaging of Cancer Cells
Source: PubMed Central journal article supplement (PMC7582890; doi:10.3390/s20195590), 2020-09-29
Supplement: sensors-20-05590-s001.pdf [file sensors-20-05590-s001.pdf]

*ESI for:*

# **Functionalized Fluorescent silica nanoparticles for bioimaging of cancer cells**

**Ruth Prieto-Montero<sup>1</sup>, Alberto Katsumiti<sup>2</sup>, Miren Cajaraville<sup>2</sup>, Iñigo López Arbeloa<sup>1</sup> and Virginia Martinez-Martinez<sup>1\*</sup>**

<sup>1</sup>Departamento de Química Física, Universidad del País Vasco/Euskal Herriko Unibertsitatea (UPV/EHU) Apartado 644, 48080, Bilbao, Spain.

<sup>2</sup>Departamento de Zoología y Biología Celular Animal, Universidad del País Vasco/Euskal Herriko Unibertsitatea (UPV/EHU) Apartado 644, 48080, Bilbao, Spain.

\*Correspondence: virginia,martinez@ehu.eus; Tel.: +34- 946015969

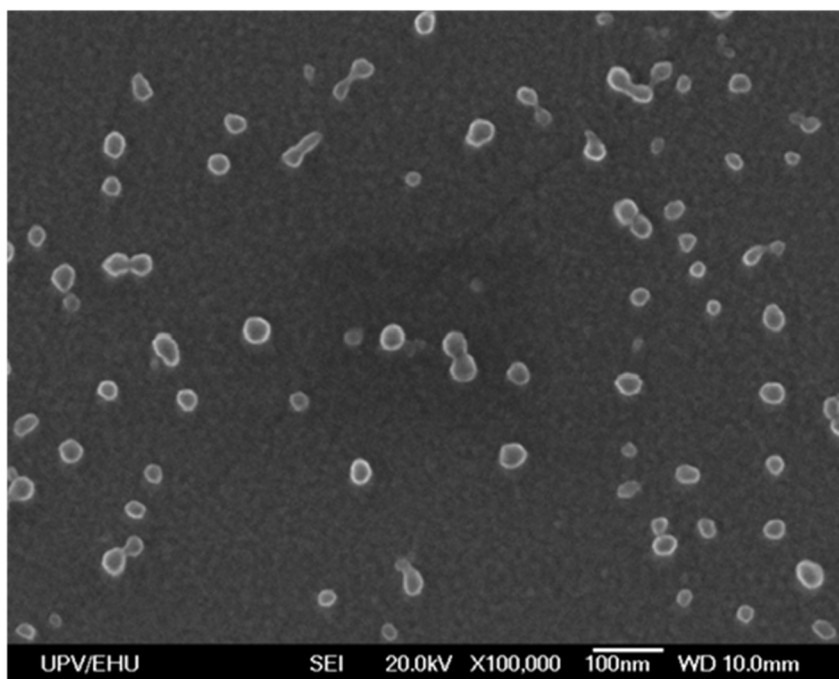

**Figure S1.** SEM image of MSNs

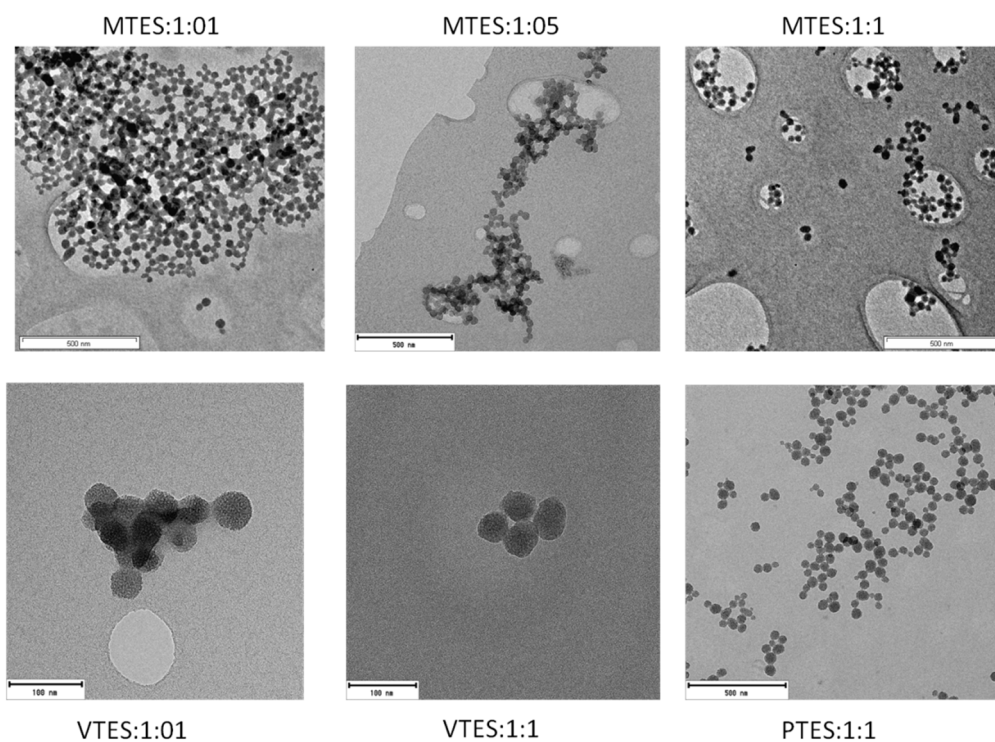

**Figure S2.** TEM images for ORMOSIL nanoparticles using different second silica source and proportions

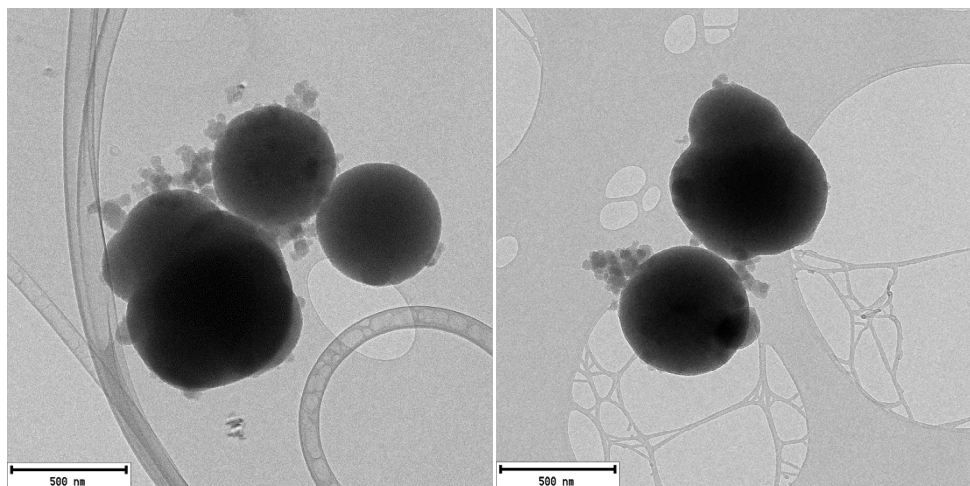

**Figure S3.** TEM images for MSN-C-R101-80

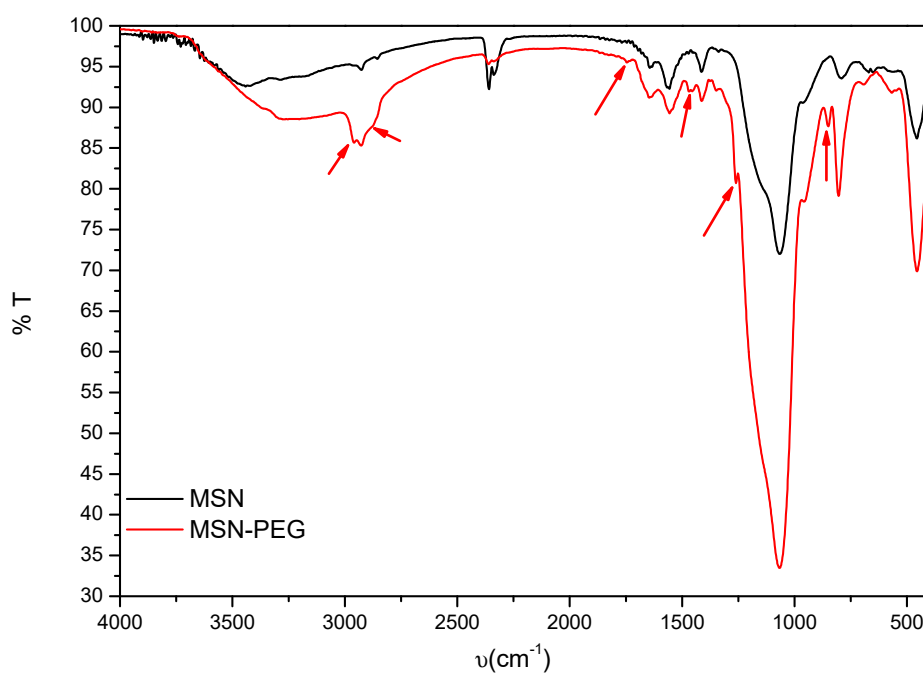

**Figure S4:** FT-IR spectra of MSN (black) and MSN-PEG (red). Most of the peaks from  $400\text{ cm}^{-1}$  to  $1200\text{ cm}^{-1}$ , and particularly the main vibration band at  $1100\text{ cm}^{-1}$  are attributed to Si-O-Si vibrations, are present in both samples. The presence of PEG molecules can be verified by the IR band at  $2960\text{ cm}^{-1}$  assigned to stretching vibration of CH<sub>2</sub> groups of the alkyl chains and the peak at  $1460\text{ cm}^{-1}$  to their deformation vibration. The broad band at  $2875\text{ cm}^{-1}$  can be assigned to stretching modes of the CH<sub>3</sub> groups. The shoulder at  $1260\text{ cm}^{-1}$  that appears in the main band may be assigned to stretching vibrations of C-O-C ether bonds.

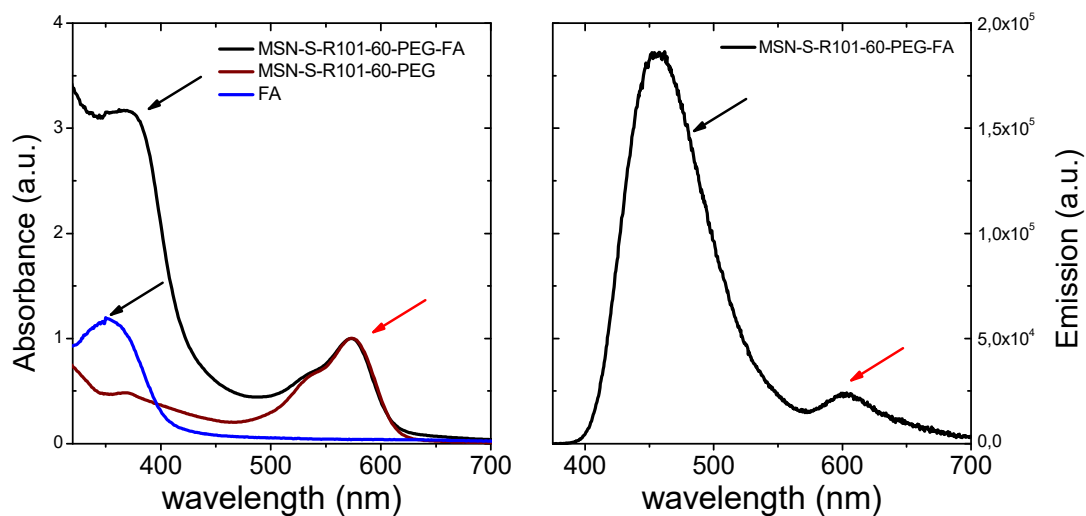

**Figure S5.** Normalized absorption spectra to the absorption peak of R101 for MSN-S-R101-60-PEG-FA (black), and MSN-S-R101-60-PEG (brown) and FA (blue) (right) and emission spectra for MSN-S-R101-60-PEG-FA under 355 nm excitation wavelength (left). Black and red arrows correspond to absorption (left) and emission (right) bands of folic acid and rhodamine 101, respectively.

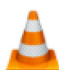

Hela-1Rhod101-Lysotracker-02z-63.mov

**Video 1.** Fluorescence images of MSN-S-R101-60-PEG internalized into lysosomes of HeLa cells; images show lysosomes (green), rhodamine 101 from (red). Scale bar 10  $\mu\text{m}$ .

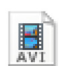

Hela\_1Rhod101\_Lysotracker\_02z\_63xZ2-1.avi

**Video 2.** Fluorescence images of MSN-S-R101-60-PEG internalized into lysosomes of HeLa cells; images show lysosomes (green), rhodamine 101 from (red). Scale bar 10  $\mu\text{m}$ .

**Technical note:**

The relative brightness of the nanoparticles with respect to free dye in solution is calculated following the equation[1]:

$$\text{Relative Brightness} = (I_{fl}^{NP}) / C^{NP} / (I_{fl}^{R101}) / C^{R101} \quad ]^i \quad [1]$$

Being  $I_{fl}^{NP}$  and  $I_{fl}^{R101}$  the fluorescence intensity of the nanoparticles suspension and dye solution, respectively and  $C^{NP}$  and  $C^{R101}$  de number of particles and R101 dye molecules in suspension and diluted solution, respectively

The number of particles is estimated by the concentration of the particles in solution ( $\text{mg mL}^{-1}$ ), the density of the porous silica nanoparticles ( $1.6 \text{ g cm}^{-3}$ ) and the average diameter of the nanoparticles ( $d = 60 \text{ nm}$ ).

---

<sup>i</sup> Cho, E.B.; Volkov, D.O.; Sokolov, I. Ultrabright fluorescent silica mesoporous silica nanoparticles: Control of particle size and dye loading. *Adv. Funct. Mater.* **2011**, *21*, 3129–3135, doi:10.1002/adfm.201100311.
